# Supplementary material for: Zika Virus Non-Structural Protein 1 Antigen-Capture Immunoassay
Source: Preprints.org preprint supplement (doi:10.20944/preprints202108.0130.v1), 2021-08-05
Supplement: Supplementary file 1 [file supplementary]

SUPPLEMENTAL MATERIAL

Zika virus non-structural protein 1 antigen-capture immunoassay

Brandon J. Beddingfield1, Jessica N. Hartnett1,¥, Russell B. Wilson2, Peter C. Kulakosky2, Kristian G. Andersen3,4,5, Refugio Robles-Sikisaka3,4,5, Nathan D. Grubaugh3,4,5,†Argelia Aybar6, Maria-Zunilla Nunez7, Cesar D. Fermin8, and Robert F. Garry1,9,*

1 Tulane University, School of Medicine, Department of Microbiology and Immunology, New Orleans, Louisiana, USA

2 Autoimmune Technologies, LLC, New Orleans, LA, USA.

3  Department of Immunology and Microbial Science, Scripps Research, La Jolla, California, 92037, USA.

4 Scripps Translational Science Institute, La Jolla, California, 92037, USA

5 Department of Integrative Structural and Computational Biology, Scripps Research, La Jolla, California, 92037, USA

6 MediPath Instituto de Patologia Molecular, & Universidad Tecnológica de Santiago (UTESA). Santiago, Republica Dominicana

7 Pontificia Universidad Católica Madre y Maestra (PUCMM), & Centro de Investigaciones Biomédicas y Clínicas (CINBIOCLI). Santiago, República Dominicana

8 Ministerio de Salud Publica (MSP), & Instituto de Innovacion Biotecnologia e Industria (IIBI). Santo Domingo, Republica Dominicana

9 Zalgen Labs, LCC, Germantown, MD, USA

¥ Current: Johnson and Johnson, Inc.New Brunswick, NJ, USA.

† Current: Yale University School of Public Health, New Haven , CT, USA.

***** Correspondence: Robert F. Garry; rfg@tulane.edu.

Figure S1: Antigen capture assay shows consistency between runs.

Two runs using the same preparation of anti-ZIKV NS1 pAbs. P<0.0001, as determined through Spearman correlation.

Figure S2: ZIKV NS1 Capture ELISA does not display interference from substances in patient serum.

Antibodies against NS1 were dissociated from antigen via detergent and assayed for increased activity using the antigen capture ELISA. A: The assay was still able to detect ZIKV NS1 well in both N-ELISA (dissociation solution was neutralized before addition of NS1) and D-ELISA (dissociation solution was neutralized in the presence of NS1). B: No significant difference was seen in ZIKV NS1 detection in patient samples between N-ELISA and D-ELISA conditions as determined by Mann-Whitney test.

Figure S3: Reactivity of NS1 antibodies without cross-adsorption.

A: Related Flavivirus reactivity using NS1 antibodies non-adsorbed against DENV NS1 shows binding at a high percentage of ZIKV NS1 levels. B: Comparison of ZIKV NS1 reactivity using adsorbed and non-adsorbed NS1 antibodies shows higher signal intensities of cross-adsorbed antibodies to ZIKV NS1 protein.

**Table S1: Primer sequences used for the generation and mutation of ZIKV/DENV NS1**

| **Primer Designation** | **Primer Sequence** |
| --- | --- |
| ZIKV NS1 WT F | 5’-ATCGATGGATCCCGTGGGGTGCTCAGTGGAC-3’ |
| ZIKV NS1 WT R | 5’- ATCGATAAGCTTTTATGACCCCGCTGTCACCA-3’ |
| DENV2 NS1 WT F | 5’- ATCGATGGATCCCGATAGTGGTTGCGTTGTG – 3’ |
| DENV2 NS1 WT R | 5’-ATCGATGCGGCCGCCTTAGGCTGTGACCAAGGAGC-3’ |
| 117, 118, 119-AAA F | 5’-ATGAGCTGCCCCATGGCTGGAAAGCCGCTGCAGCATCGTATTTTGTTAGG-3’ |
| 117, 118, 119-AAA R | 5’-CTGTTGTTGGTCTTTGCCGCCCTAACAAAATACGATGCTGCAGCGGCTTTC CAGCCG-3’ |
| 227, 228, 229-AAA F | 5’-GAATGGCCAAAGTCTGCCGCTGCCTGGACAGATGGAGTAGAAGAAAGTGATC TTATCATACCC-3’ |
| 227, 228, 229-AAA R | 5’-CTCCATCTGTCCAGGCAGCGGCAGACTTTGGCCATTCACATGTTTTCATCTCAA TCAGGTG-3’ |

Table S2: Primers used for the Generation of Flavivirus NS1 Proteins

| Primer Designation | Primer Sequence |
| --- | --- |
| SLEV NS1 WT F | 5’- ATCGATGGATCCCGCTGATTCGGGATGTGCA -3’ |
| SLEV NS1 WT R | 5’- ATCGATAAGCTTTTAAGCTGTCACTCGAGATTT– 3’ |
| WNV NS1 WT F | 5’- ATCGATGGATCCCGACACTGGGTGTGCCATA -3’ |
| WNV NS1 WT R | 5’- ATCGATGCGGCCGCTTAAGCATTCACTTGTGACTG– 3’ |
| YFV NS1 WT F | 5’- ATCGATCAATTGCCAAGGATGCGCCATCAAC -3’ |
| YFV NS1 WT R | 5’ - ATCGATGCGGCCGCTTATATTTCTCCAGCTGTAAC – 3’ |

Table S3: NS1/IgM/IgG Levels in Surveyed Patient Serum

Sample ID numbers beginning with Z originate from Colombia, while those beginning with DR originate from the Dominican Republic.

| Sample ID | IgM WT | IgM  117-119 | IgM  227-229 | IgG  WT | IgG  117-119 | IgG 227-229 | NS1 Concentration (ng/mL) |
| --- | --- | --- | --- | --- | --- | --- | --- |
| Z-10 | 0.18675 | 0.13835 | 0.12285 | 1.20945 | 1.11725 | 1.14445 | 82.05 |
| Z-100 | 0.18045 | 0.12485 | 0.12275 | 0.59875 | 0.7307 | 0.61055 | 83.98 |
| Z-101 | 0.1868 | 0.1559 | 0.10545 | 1.88775 | 1.86325 | 1.82465 | ND |
| Z-102 | 0.1221 | 0.1034 | 0.0889 | 1.41885 | 1.4985 | 1.4237 | 221.8 |
| Z-103 | 0.5427 | 0.34535 | 0.1813 | 0.12735 | 0.0831 | 0.07875 | 73.8 |
| Z-104 | 0.19075 | 0.1023 | 0.0616 | 0.4231 | 0.4824 | 0.4387 | 11.68 |
| Z-105 | 0.3016 | 0.19225 | 0.12755 | 1.77325 | 1.7653 | 1.76545 | 10.48 |
| Z-106 | 0.5318 | 0.31145 | 0.1454 | 1.05435 | 1.18865 | 1.1215 | 60.99 |
| Z-107 | 0.1959 | 0.10525 | 0.0644 | 0.8615 | 1.04225 | 0.93125 | 54.11 |
| Z-110 | 0.35795 | 0.2078 | 0.09665 | 1.78745 | 1.78155 | 1.7858 | 625.48 |
| Z-115 | 0.18385 | 0.1088 | 0.04575 | 1.86325 | 1.82935 | 1.6451 | 354.03 |
| Z-116 | 0.1003 | 0.0811 | 0.07025 | 1.9695 | 2.05525 | 1.97125 | 50.31 |
| Z-117 | 0.11065 | 0.07645 | 0.05305 | 1.9428 | 1.92395 | 1.95725 | ND |
| Z-118 | 0.0924 | 0.08855 | 0.0584 | 1.88995 | 1.87645 | 1.8721 | 36.34 |
| Z-119 | 0.2128 | 0.14365 | 0.1116 | 1.7582 | 1.75715 | 1.7436 | ND |
| Z-12 | 0.1454 | 0.10885 | 0.17605 | 2.13385 | 1.99755 | 2.00915 | ND |
| Z-120 | 0.5909 | 0.8051 | 0.55625 | 1.6434 | 1.65535 | 1.632 | 72.17 |
| Z-121 | 0.1013 | 0.09255 | 0.05955 | 1.7243 | 1.7405 | 1.69705 | 81.26 |
| Z-122 | 0.26625 | 0.1755 | 0.11025 | 1.46965 | 1.56365 | 1.5706 | 101.9 |
| Z-123 | 0.32225 | 0.2368 | 0.1847 | 1.9463 | 1.983 | 1.97375 | ND |
| Z-124 | 0.10315 | 0.0859 | 0.0675 | 1.85715 | 1.8266 | 2.00635 | 17.93 |
| Z-125 | 0.10775 | 0.09165 | 0.0798 | 0.14495 | 0.13275 | 0.11665 | ND |
| Z-126 | 0.59 | 1.13835 | 1.14065 | 1.8974 | 1.90265 | 1.86705 | ND |
| Z-127 | 0.28025 | 0.341 | 0.3252 | 1.9503 | 1.9229 | 1.84155 | 21.25 |
| Z-128 | 0.2137 | 0.1842 | 0.14925 | 1.77175 | 1.71435 | 1.59895 | ND |
| Z-129 | 0.335 | 0.29555 | 0.2833 | 1.4611 | 1.5747 | 1.4368 | ND |
| Z-13 | 0.1848 | 0.12995 | 0.1248 | 1.79835 | 1.73535 | 1.7803 | ND |
| Z-130 | 0.2383 | 0.1407 | 0.39475 | 0.9602 | 1.1003 | 0.95095 | 88.2 |
| Z-131 | 0.15395 | 0.1328 | 0.1037 | 2.00515 | 1.896 | 1.9032 | 219.51 |
| Z-132 | 0.13245 | 0.1287 | 0.11295 | 2.0958 | 1.95755 | 2.0976 | ND |
| Z-133 | 0.1442 | 0.12745 | 0.1121 | 1.83025 | 1.8161 | 1.8482 | ND |
| Z-134 | 0.1425 | 0.1176 | 0.0942 | 0.7335 | 0.636 | 0.5691 | 233.32 |
| Z-135 | 0.10035 | 0.0925 | 0.06955 | 1.9588 | 1.91895 | 1.90325 | ND |
| Z-136 | 0.29165 | 0.27365 | 0.26655 | 1.4938 | 1.53255 | 1.38375 | ND |
| Z-137 | 0.1748 | 0.1166 | 0.09645 | 0.73785 | 0.77865 | 0.6258 | 36.02 |
| Z-138 | 0.2014 | 0.1909 | 0.2081 | 0.21675 | 0.2691 | 0.19655 | ND |
| Z-139 | 0.2412 | 0.1951 | 0.1497 | 1.87225 | 1.8687 | 1.84365 | ND |
| Z-14 | 0.2553 | 0.24155 | 0.2261 | 1.9442 | 1.86725 | 1.95525 | ­̶­̶ |
| Z-140 | ­̶­̶ | ­̶­̶ | ­̶­̶ | ­̶­̶ | ­̶­̶ | ­̶­̶ | 269.39 |
| Z-141 | 0.2237 | 0.1593 | 0.1923 | 1.0021 | 1.24345 | 1.29265 | 58.7 |
| Z-142 | 0.245 | 0.2791 | 0.27705 | 0.28615 | 0.34375 | 0.2863 | ND |
| Z-143 | 0.42235 | 0.274 | 0.22865 | 1.65795 | 1.717 | 1.6307 | 387.84 |
| Z-144 | 0.1385 | 0.1042 | 0.07425 | 2.01175 | 1.94975 | 1.85175 | ND |
| Z-145 | 0.50845 | 0.44485 | 0.40785 | 1.88245 | 1.8902 | 1.81805 | ND |
| Z-146 | 0.3082 | 0.20185 | 0.11865 | 1.7067 | 1.825 | 1.723 | ND |
| Z-147 | 0.07735 | 0.0752 | 0.0489 | 1.30535 | 1.3551 | 1.3287 | ND |
| Z-148 | 0.3067 | 0.2744 | 0.24635 | 1.8125 | 1.76145 | 1.85785 | 30.3 |
| Z-149 | 0.28285 | 0.24735 | 0.19545 | 1.97425 | 1.93575 | 2.00455 | 84.92 |
| Z-150 | 0.2269 | 0.1854 | 0.12305 | 1.8652 | 1.8393 | 1.8893 | ND |
| Z-151 | 0.27795 | 0.2344 | 0.1948 | 1.911 | 1.9248 | 1.88705 | ND |
| Z-152 | 0.28935 | 0.24915 | 0.2001 | 1.483 | 1.6654 | 1.4719 | ND |
| Z-153 | 0.3201 | 0.24765 | 0.23835 | 1.55675 | 1.7059 | 1.6278 | ND |
| Z-154 | 0.0911 | 0.0858 | 0.07965 | 1.85525 | 1.97365 | 1.89725 | ND |
| Z-155 | 0.2276 | 0.1663 | 0.1441 | 1.75755 | 1.87555 | 1.79605 | 2224.9 |
| Z-157 | 0.0973 | 0.0973 | 0.0583 | 2.0347 | 2.0291 | 1.88515 | 1970.42 |
| Z-158 | 0.29395 | 0.29395 | 0.16985 | 1.96405 | 1.91655 | 1.76825 | 215.39 |
| Z-159 | 0.10485 | 0.10485 | 0.05615 | 0.16 | 0.13385 | 0.10675 | 29.22 |
| Z-16 | 0.4187 | 0.2703 | 0.33215 | 2.0692 | 1.94725 | 2.06395 | 45.99 |
| Z-160 | 0.1442 | 0.1442 | 0.0574 | 1.55275 | 1.5792 | 1.4184 | 131.56 |
| Z-161 | 0.3592 | 0.3592 | 0.12335 | 2.04005 | 1.9368 | 1.811 | 311.05 |
| Z-162 | 0.3122 | 0.3122 | 0.1169 | 0.8183 | 0.78715 | 0.6504 | ND |
| Z-163 | 0.22695 | 0.22695 | 0.13395 | 1.4193 | 1.4626 | 1.2019 | ND |
| Z-164 | 0.4344 | 0.4344 | 0.22625 | 0.9534 | 0.9789 | 0.7495 | 136.43 |
| Z-165 | 0.3721 | 0.3721 | 0.21275 | 1.9818 | 1.9589 | 1.80145 | 110.54 |
| Z-166 | 0.4125 | 0.4125 | 0.25475 | 1.72945 | 1.72055 | 1.4958 | ND |
| Z-167 | 0.2901 | 0.2901 | 0.20045 | 1.8583 | 1.85295 | 1.80355 | ND |
| Z-168 | 0.10585 | 0.10585 | 0.07455 | 0.4654 | 0.4438 | 0.7577 | ND |
| Z-169 | 0.36165 | 0.36165 | 0.17725 | 1.10865 | 1.06755 | 1.15185 | 75.23 |
| Z-17 | 0.347 | 0.19665 | 0.20805 | 1.37585 | 1.1515 | 1.316 | 104.32 |
| Z-170 | 0.31445 | 0.31445 | 0.2202 | 0.20205 | 0.1584 | 0.9291 | 80.62 |
| Z-171 | 0.25225 | 0.25225 | 0.15275 | 1.4979 | 1.53325 | 1.4431 | 123.14 |
| Z-172 | 0.25345 | 0.25345 | 0.14675 | 1.7365 | 1.73045 | 1.39885 | 44.95 |
| Z-173 | 0.1864 | 0.1864 | 0.0476 | 1.88295 | 1.8239 | 1.77385 | ND |
| Z-174 | 0.31205 | 0.31205 | 0.1711 | 1.4173 | 1.40435 | 1.36255 | 30.32 |
| Z-175 | 0.133 | 0.133 | 0.1222 | 1.80045 | 1.8371 | 1.816 | 75.87 |
| Z-176 | 0.07065 | 0.07065 | 0.04755 | 1.19785 | 1.22845 | 1.2073 | ND |
| Z-177 | 0.11585 | 0.11585 | 0.06905 | 1.51245 | 1.5014 | 1.446 | 393.65 |
| Z-178 | 0.3342 | 0.3342 | 0.2245 | 1.97355 | 1.9264 | 1.83475 | 99.65 |
| Z-179 | 0.1483 | 0.1483 | 0.0924 | 1.88545 | 1.8379 | 1.68495 | ND |
| Z-18 | 0.82585 | 0.8989 | 0.8764 | 2.17995 | 2.08175 | 2.1593 | ND |
| Z-180 | 0.20385 | 0.20385 | 0.1001 | 1.5866 | 1.59005 | 1.3541 | ND |
| Z-181 | 0.21545 | 0.21545 | 0.1011 | 1.79655 | 1.70395 | 1.70775 | 154.22 |
| Z-182 | 0.2531 | 0.2531 | 0.77915 | 1.96735 | 1.90445 | 1.86915 | 76.67 |
| Z-183 | 0.1187 | 0.1187 | 0.0737 | 1.8534 | 1.81235 | 1.8609 | 290.05 |
| Z-185 | 0.11005 | 0.11005 | 0.0667 | 0.48025 | 0.4041 | 0.4594 | ND |
| Z-187 | 0.11115 | 0.11115 | 0.076 | 2.07605 | 1.94445 | 1.90215 | 426.76 |
| Z-188 | 0.29945 | 0.29945 | 0.14505 | 2.02945 | 1.8909 | 1.85105 | 148.28 |
| Z-189 | 0.1754 | 0.1754 | 0.06205 | 1.7437 | 1.59945 | 1.58855 | 88.93 |
| Z-19 | 0.28355 | 0.19635 | 0.2093 | 0.40865 | 0.30955 | 0.32515 | ND |
| Z-191 | 0.23635 | 0.23635 | 0.16105 | 2.16735 | 2.02285 | 1.96965 | 81.34 |
| Z-192 | 0.42055 | 0.3672 | 0.3458 | 0.6123 | 0.8245 | 0.8703 | 128.7 |
| Z-193 | 0.13585 | 0.09715 | 0.09015 | 2.04405 | 2.153 | 2.0501 | ND |
| Z-194 | 0.19975 | 0.1472 | 0.15495 | 0.27455 | 0.2828 | 0.25855 | 974.72 |
| Z-195 | 0.7876 | 0.6972 | 0.7514 | 1.44715 | 1.6799 | 1.6835 | 58.36 |
| Z-196 | 0.2498 | 0.1925 | 0.17915 | 0.98695 | 1.25535 | 1.23515 | ND |
| Z-197 | 0.4337 | 0.2904 | 0.3699 | 0.9509 | 1.1214 | 1.0011 | 76.86 |
| Z-198 | 0.24885 | 0.20025 | 0.20225 | 0.8044 | 0.87015 | 0.85485 | ND |
| Z-199 | 0.27275 | 0.26885 | 0.2395 | 2.0184 | 2.13165 | 2.0367 | 64.69 |
| Z-20 | 0.20355 | 0.1613 | 0.17315 | 1.69 | 1.6782 | 1.6789 | ND |
| Z-200 | ­̶­̶ | ­̶­̶ | ­̶­̶ | ­̶­̶ | ­̶­̶ | ­̶­̶ | 1277.94 |
| Z-202 | 0.4921 | 0.50295 | 0.5169 | 1.92995 | 2.0421 | 2.01765 | ND |
| Z-21 | 0.64465 | 0.55325 | 0.49085 | 0.8335 | 0.85725 | 0.8142 | ND |
| Z-22 | 0.3695 | 0.28635 | 0.2406 | 1.9451 | 1.8883 | 1.8351 | ND |
| Z-23 | 0.25055 | 0.19355 | 0.17165 | 1.9541 | 1.86585 | 1.876 | ND |
| Z-237 | 0.31225 | 0.15925 | 0.1819 | 0.20945 | 0.1734 | 0.17695 | ­̶­̶ |
| Z-238 | 0.1825 | 0.1115 | 0.11135 | 0.48935 | 0.59735 | 0.6182 | ­̶­̶ |
| Z-239 | 0.1682 | 0.0951 | 0.10215 | 0.38095 | 0.41435 | 0.4214 | ­̶­̶ |
| Z-24 | 0.2169 | 0.16275 | 0.1614 | 2.006 | 1.88895 | 1.9052 | 554.32 |
| Z-240 | 0.1566 | 0.10155 | 0.10785 | 0.36965 | 0.392 | 0.4085 | ­̶­̶ |
| Z-241 | 0.30035 | 0.21315 | 0.22715 | 0.6306 | 0.74915 | 0.7864 | ­̶­̶ |
| Z-242 | 0.19815 | 0.14335 | 0.1403 | 0.4009 | 0.66125 | 0.7135 | ­̶­̶ |
| Z-243 | 0.1527 | 0.08845 | 0.0845 | 0.41205 | 0.36935 | 0.35185 | ­̶­̶ |
| Z-244 | 0.2309 | 0.1578 | 0.15525 | 0.4848 | 0.4492 | 0.48665 | ­̶­̶ |
| Z-245 | 0.1382 | 0.0975 | 0.09775 | 0.24245 | 0.22545 | 0.2328 | ­̶­̶ |
| Z-246 | 0.09275 | 0.0592 | 0.06615 | 0.22445 | 0.2415 | 0.23645 | ­̶­̶ |
| Z-247 | 0.2952 | 0.27395 | 0.27515 | 0.4086 | 0.4947 | 0.5101 | ­̶­̶ |
| Z-248 | 0.1991 | 0.133 | 0.1341 | 0.7241 | 0.732 | 0.75715 | ­̶­̶ |
| Z-249 | 0.148 | 0.10925 | 0.11235 | 0.33705 | 0.34745 | 0.3316 | ­̶­̶ |
| Z-25 | 0.19095 | 0.1324 | 0.12165 | 1.9869 | 1.89005 | 1.923 | ND |
| Z-250 | 0.5324 | 0.34425 | 0.3553 | 0.3516 | 0.42515 | 0.4041 | ­̶­̶ |
| Z-251 | 0.09235 | 0.0899 | 0.07505 | 0.78945 | 0.84745 | 0.8697 | ­̶­̶ |
| Z-252 | 0.18625 | 0.12565 | 0.1345 | 0.41425 | 0.51015 | 0.5498 | ­̶­̶ |
| Z-253 | 0.12585 | 0.07495 | 0.0855 | 0.43485 | 0.5486 | 0.57155 | ­̶­̶ |
| Z-254 | 0.35375 | 0.1805 | 0.20305 | 0.3387 | 0.3844 | 0.40415 | ­̶­̶ |
| Z-255 | 0.078 | 0.0602 | 0.0692 | 0.5039 | 0.60715 | 0.64475 | ­̶­̶ |
| Z-256 | 0.12205 | 0.12705 | 0.1374 | 1.53605 | 1.6347 | 1.7081 | ­̶­̶ |
| Z-257 | 0.11355 | 0.0805 | 0.08995 | 0.0689 | 0.0606 | 0.0566 | ­̶­̶ |
| Z-258 | 0.11525 | 0.09205 | 0.09775 | 0.28385 | 0.2433 | 0.22905 | ­̶­̶ |
| Z-259 | 0.1749 | 0.14505 | 0.19065 | 0.23905 | 0.2813 | 0.2836 | ­̶­̶ |
| Z-26 | 0.15945 | 0.1306 | 0.13065 | 1.9216 | 1.788 | 1.78975 | ND |
| Z-260 | 0.33095 | 0.2642 | 0.30345 | 0.62425 | 0.6791 | 0.7911 | ­̶­̶ |
| Z-261 | 0.4041 | 0.3056 | 0.33405 | 0.7203 | 0.82835 | 0.54735 | ­̶­̶ |
| Z-262 | 0.21545 | 0.14235 | 0.1518 | 0.4352 | 0.498 | 0.5098 | ­̶­̶ |
| Z-263 | 0.2176 | 0.20705 | 0.17805 | 0.5991 | 0.66525 | 0.68235 | ­̶­̶ |
| Z-27 | 0.15365 | 0.12485 | 0.1293 | 1.84135 | 1.8062 | 1.7312 | ND |
| Z-34 | 0.2789 | 0.20765 | 0.19255 | 1.8773 | 1.79885 | 1.6591 | 365.27 |
| Z-35 | 0.22015 | 0.16155 | 0.1375 | 1.0025 | 0.9052 | 0.71785 | POS |
| Z-36 | 0.14855 | 0.1264 | 0.1194 | 2.1073 | 1.9994 | 1.8656 | 365.27 |
| Z-37 | ­̶­̶ | ­̶­̶ | ­̶­̶ | ­̶­̶ | ­̶­̶ | ­̶­̶ | ND |
| Z-38 | 0.1719 | 0.16195 | 0.14875 | 2.10595 | 2.0817 | 1.96995 | ND |
| Z-39 | 0.16675 | 0.1427 | 0.1192 | 2.09365 | 1.9209 | 1.7449 | ND |
| Z-40 | 0.17235 | 0.16625 | 0.14095 | 1.48305 | 1.4563 | 1.41175 | ND |
| Z-41 | 0.3676 | 0.29905 | 0.2539 | 2.14975 | 2.1056 | 2.0478 | ND |
| Z-42 | 0.67045 | 0.66385 | 0.7727 | 2.0505 | 1.95535 | 1.89305 | 465.1 |
| Z-43 | 0.1818 | 0.1472 | 0.14725 | 2.0818 | 2.10905 | 2.0259 | 91.12 |
| Z-44 | 0.4155 | 0.4032 | 0.3232 | 2.3109 | 2.2325 | 2.17765 | ND |
| Z-45 | 0.48665 | 0.3742 | 0.34065 | 0.45845 | 0.4349 | 0.31215 | 201.6 |
| Z-46 | 0.2071 | 0.16555 | 0.1741 | 1.8365 | 1.85515 | 1.67285 | ND |
| Z-47 | 0.15955 | 0.15785 | 0.1416 | 2.1065 | 2.0067 | 1.88715 | 360.25 |
| Z-48 | 0.24085 | 0.22315 | 0.23305 | 1.2557 | 1.44425 | 1.52445 | 123.75 |
| Z-49 | 0.11125 | 0.10595 | 0.1159 | 1.98955 | 2.0442 | 2.072 | ND |
| Z-5 | 0.29525 | 0.17095 | 0.17285 | 1.65425 | 1.35015 | 1.66575 | ND |
| Z-50 | 0.1386 | 0.11185 | 0.1124 | 0.43375 | 0.46675 | 0.44475 | ND |
| Z-51 | 0.1436 | 0.1051 | 0.11255 | 1.29315 | 1.31895 | 1.3803 | ND |
| Z-52 | 0.21265 | 0.1838 | 0.19555 | 1.44415 | 1.70945 | 1.83175 | ND |
| Z-53 | 0.18045 | 0.17015 | 0.1329 | 0.1907 | 0.18475 | 0.1806 | 51.47 |
| Z-54 | 0.0749 | 0.09405 | 0.08075 | 2.09555 | 2.05075 | 2.02425 | 76.16 |
| Z-55 | 0.22445 | 0.25075 | 0.2255 | 1.71515 | 1.78425 | 1.79875 | 27.05 |
| Z-56 | 0.20445 | 0.19705 | 0.1481 | 1.82595 | 1.8049 | 1.8126 | 254.81 |
| Z-57 | 0.15025 | 0.1468 | 0.1024 | 2.07765 | 2.03085 | 1.97875 | ND |
| Z-58 | 0.15925 | 0.17075 | 0.1391 | 2.03995 | 2.0355 | 1.94085 | 469.02 |
| Z-59 | 0.1048 | 0.09575 | 0.0707 | 2.08135 | 2.0572 | 1.99555 | 108.6 |
| Z-6 | 0.19395 | 0.1413 | 0.1339 | 2.107 | 1.9163 | 2.0794 | 370.44 |
| Z-60 | 0.2042 | 0.17785 | 0.1629 | 1.7426 | 1.7212 | 1.6583 | ND |
| Z-61 | 0.2194 | 0.23165 | 0.16095 | 0.47285 | 0.56115 | 0.64465 | 224.81 |
| Z-62 | 0.1419 | 0.144 | 0.1157 | 2.07165 | 2.0312 | 1.98715 | 152.12 |
| Z-63 | 0.25645 | 0.20925 | 0.15845 | 2.10235 | 2.0378 | 2.04585 | ND |
| Z-64 | 0.1291 | 0.12755 | 0.0963 | 1.6099 | 1.65585 | 1.7214 | ND |
| Z-66 | 0.2315 | 0.2182 | 0.15595 | 1.7724 | 1.7806 | 1.8385 | ND |
| Z-67 | 0.16785 | 0.17585 | 0.1531 | 2.0853 | 2.0432 | 2.01585 | ND |
| Z-68 | 0.21665 | 0.20305 | 0.1379 | 2.09215 | 2.0181 | 1.9697 | ND |
| Z-69 | 0.31725 | 0.2699 | 0.2126 | 2.21645 | 2.26165 | 2.1225 | ND |
| Z-70 | 0.32695 | 0.3293 | 0.2473 | 2.1993 | 2.11595 | 2.0914 | ND |
| Z-71 | 0.2809 | 0.28905 | 0.21715 | 1.77255 | 1.82185 | 1.8841 | ND |
| Z-72 | 0.0637 | 0.0516 | 0.059 | 0.94465 | 1.10855 | 1.27405 | 36.16 |
| Z-73 | 0.31675 | 0.2257 | 0.22825 | 1.6721 | 1.73375 | 1.7611 | 49.1 |
| Z-74 | 0.56095 | 0.59825 | 0.6439 | 1.5507 | 1.5711 | 1.6324 | 38.05 |
| Z-75 | 0.36255 | 0.2715 | 0.25755 | 1.504 | 1.5071 | 1.5382 | 658.88 |
| Z-76 | 0.1216 | 0.1092 | 0.09945 | 1.96815 | 1.91585 | 1.887 | 49.11 |
| Z-77 | 0.1078 | 0.1047 | 0.0757 | 0.22335 | 0.1913 | 0.1759 | 158.09 |
| Z-78 | 0.2708 | 0.2242 | 0.1825 | 2.20895 | 2.05345 | 2.0541 | 122.35 |
| Z-79 | 0.0883 | 0.07305 | 0.0625 | 2.0178 | 1.959 | 1.9714 | ND |
| Z-8 | 0.1418 | 0.09255 | 0.0989 | 1.6074 | 1.45935 | 1.5757 | ND |
| Z-80 | 0.44495 | 0.38285 | 0.35135 | 0.61575 | 0.5669 | 0.64285 | 2112.88 |
| Z-81 | 0.22855 | 0.18065 | 0.1472 | 1.6462 | 1.60735 | 1.7455 | POS |
| Z-82 | 0.61205 | 0.4922 | 0.50405 | 0.5077 | 0.47085 | 0.49835 | 1008.49 |
| Z-83 | 0.2784 | 0.195 | 0.2174 | 0.25675 | 0.23915 | 0.26535 | 137.49 |
| Z-84 | 0.1354 | 0.09125 | 0.09075 | 0.65685 | 0.4402 | 0.6209 | 50.1 |
| Z-85 | 0.1751 | 0.1282 | 0.1181 | 1.57815 | 1.548 | 1.59465 | ND |
| Z-86 | 0.201 | 0.13375 | 0.134 | 0.89355 | 0.4379 | 0.43415 | ND |
| Z-87 | 0.31065 | 0.25375 | 0.2445 | 1.75145 | 1.7602 | 1.78615 | ND |
| Z-88 | 0.22535 | 0.147 | 0.14695 | 1.76875 | 1.72965 | 1.7167 | 3184.7 |
| Z-89 | 0.0649 | 0.0559 | 0.0519 | 1.77665 | 1.7198 | 1.7254 | 20.77 |
| Z-9 | 0.2573 | 0.16085 | 0.1561 | 2.0518 | 1.97985 | 1.96435 | 433.98 |
| Z-90 | 0.17595 | 0.11085 | 0.078 | 1.591 | 1.59325 | 1.61665 | 182.59 |
| Z-91 | 0.51245 | 0.3611 | 0.28335 | 1.4643 | 1.5779 | 1.47095 | 495.49 |
| Z-92 | 0.1176 | 0.10955 | 0.09285 | 1.5224 | 1.5916 | 1.52355 | ND |
| Z-93 | 0.0769 | 0.0652 | 0.05905 | 1.5744 | 1.59625 | 1.46795 | ND |
| Z-94 | 0.15855 | 0.11015 | 0.0966 | 1.49695 | 1.6053 | 1.5803 | 24.22 |
| Z-95 | 0.46565 | 0.3215 | 0.2407 | 1.2856 | 1.41575 | 1.36525 | 905.43 |
| Z-96 | 0.1444 | 0.1057 | 0.0945 | 1.5691 | 1.66045 | 1.62075 | ND |
| Z-97 | 0.49495 | 0.53765 | 0.49565 | 1.8198 | 1.78635 | 1.84395 | 304.61 |
| Z-98 | 0.3182 | 0.20135 | 0.1508 | 1.6306 | 1.6692 | 1.5995 | ND |
| Z-99 | 0.7843 | 0.97365 | 0.78625 | 1.54175 | 1.6126 | 1.53885 | 55.92 |
| DR 1 | 0.022 | 0.024 | 0.023 | 0.284 | 0.409 | 0.3765 | 30.47 |
| DR 2 | 0.098 | 0.095 | 0.096 | 0.763 | 0.7895 | 0.726 | ­̶­̶ |
| DR 4 | 0.043 | 0.056 | 0.058 | 0.035 | 0.0285 | 0.028 | ND |
| DR 7 | ­̶­̶ | ­̶­̶ | ­̶­̶ | ­̶­̶ | ­̶­̶ | ­̶­̶ | 54.91 |
| DR 8 | 0.036 | 0.052 | 0.049 | 0.0265 | 0.023 | 0.0105 | 91.3 |
| DR 9 | ­̶­̶ | ­̶­̶ | ­̶­̶ | ­̶­̶ | ­̶­̶ | ­̶­̶ | 20.43 |
| DR 10 | 0.0455 | 0.0375 | 0.042 | 0.669 | 0.772 | 0.7405 | ND |
| DR 11 | 0.0595 | 0.0875 | 0.0835 | 0.096 | 0.1285 | 0.0945 | 5.71 |
| DR 12 | 0.013 | 0.0195 | 0.0185 | 0.241 | 0.2285 | 0.1585 | ND |
| DR 13 | 0.048 | 0.056 | 0.0525 | 0.5825 | 0.737 | 0.6345 | 66.81 |
| DR 14 | 0.116 | 0.123 | 0.14 | 0.131 | 0.1625 | 0.1285 | 173.48 |
| DR 15 | 0.0805 | 0.0805 | 0.0785 | 0.048 | 0.066 | 0.052 | 83.24 |
| DR 17 | 0.0635 | 0.0845 | 0.08 | 1.253 | 1.2075 | 1.103 | 31.91 |
| DR 18 | 0.067 | 0.071 | 0.0685 | 0.053 | 0.23 | 0.102 | 83.24 |
| DR 19 | 0.055 | 0.0675 | 0.0655 | 0.393 | 0.495 | 0.465 | ND |
| DR 20 | 0.068 | 0.0715 | 0.071 | 1.2845 | 1.1915 | 0.878 | 2.37 |
| DR 21 | 0.047 | 0.066 | 0.071 | 0.1 | 0.1575 | 0.076 | 20.64 |
| DR 22 | 0.0645 | 0.0765 | 0.074 | 0.364 | 0.386 | 0.2585 | ND |
| DR 23 | 0.1195 | 0.1535 | 0.147 | 0.2815 | 0.388 | 0.2565 | 30.27 |
| DR 24 | 0.1055 | 0.121 | 0.116 | 0.218 | 0.355 | 0.259 | 34.18 |
| DR 25 | 0.0185 | 0.031 | 0.0305 | 0.0615 | 0.0735 | 0.054 | ND |
| DR 26 | 0.053 | 0.062 | 0.064 | 0.95 | 1.038 | 0.575 | ND |
| DR 27 | 0.0365 | 0.0425 | 0.043 | 0.0295 | 0.0235 | 0.0205 | ND |
| DR 28 | 0.053 | 0.075 | 0.074 | 0.044 | 0.033 | 0.013 | 73.3 |
| DR 29 | 0.0835 | 0.0945 | 0.0955 | 0.06 | 0.0855 | 0.0305 | ND |
| DR 30 | 0.099 | 0.108 | 0.103 | 0.1915 | 0.162 | 0.077 | 9.26 |
| DR 31 | 0.022 | 0.024 | 0.0245 | 0.042 | 0.055 | 0.0235 | 23.81 |
| DR 32 | 0.027 | 0.039 | 0.0425 | 0.294 | 0.48 | 0.2655 | ND |
| DR 33 | 0.0605 | 0.0705 | 0.0685 | 0.327 | 0.4385 | 0.257 | ND |
| DR 34 | 0.1805 | 0.178 | 0.1735 | 0.99 | 0.925 | 0.4695 | 115.73 |
| DR 35 | 0.115 | 0.12 | 0.1275 | 0.2825 | 0.5005 | 0.4775 | 4.97 |
| DR 36 | 0.0375 | 0.064 | 0.038 | 0.233 | 0.308 | 0.1095 | 358.6 |
| DR 37 | 0.1075 | 0.155 | 0.156 | 0.179 | 0.199 | 0.075 | 169.11 |
| DR 38 | 0.0475 | 0.0625 | 0.0615 | 0.4125 | 0.3965 | 0.1735 | 1171.01 |
| DR 39 | 0.06 | 0.086 | 0.084 | 0.414 | 0.5475 | 0.2575 | 65.48 |
| DR 40 | 0.036 | 0.0525 | 0.056 | 0.0335 | 0.022 | 0.008 | 157.99 |
| DR 41 | 0.1435 | 0.16 | 0.1485 | 0.047 | 0.0685 | 0.024 | 264.38 |

POS: Positive, but below limit of quantification. DR: Dominican Republic. 117-119= ZIKV NS1 W117A, G118A, K119A. 227-229= ZIKV NS1 H227A, T228A, L229A.
